# Supplementary material for: Joint modelling of longitudinal and time-to-event data: an illustration using CD4 count and mortality in a cohort of patients initiated on antiretroviral therapy
Source: Springer Nature journal article supplement (doi:10.1186/s12879-020-04962-3), 2020-03-30
Supplement: MOESM1 [file 17844636]

## Additional Files

Table S1: Baseline predictors of CD4 count evolution using linear mixed effects multivariable model

| Effect                                     | $\beta$ estimate <sup>a</sup> | S.E. | p-value |
|--------------------------------------------|-------------------------------|------|---------|
| Intercept                                  | 17.82                         | 0.82 | < 0.001 |
| Age (years)                                | -0.02                         | 0.01 | 0.047   |
| Men (ref: women)                           | -1.90                         | 0.22 | < 0.001 |
| Urban site (ref: rural)                    | -0.33                         | 0.25 | 0.189   |
| No prevalent TB (ref: prevalent TB)        | 0.71                          | 0.31 | 0.022   |
| Log <sub>10</sub> viral load               | -0.65                         | 0.12 | < 0.001 |
| Time on ART (years)                        | 2.67                          | 0.39 | < 0.001 |
| Time × no prevalent TB (ref: prevalent TB) | -1.27                         | 0.17 | < 0.001 |
| Time × log <sub>10</sub> viral load        | 0.24                          | 0.07 | 0.005   |

<sup>a</sup>adjusted estimates; S.E.: standard error

Table S2: Baseline predictors of mortality using Cox proportional hazards model

| Effect                                   | HR (95% CI)      | p-value | aHR (95% CI)     | p-value |
|------------------------------------------|------------------|---------|------------------|---------|
| Age (years)                              | 1.01 (0.99-1.03) | 0.191   | 1.01 (0.99-1.03) | 0.237   |
| Rural site                               | 1.0              |         | 1.0              |         |
| Urban site                               | 0.97 (0.66-1.43) | 0.882   | 1.02 (0.68-1.55) | 0.919   |
| Women                                    | 1.0              |         | 1.0              |         |
| Men                                      | 1.69 (1.21-2.35) | 0.002   | 1.62 (1.16-2.26) | 0.005   |
| No prevalent TB                          | 1.0              |         | 1.0              |         |
| Prevalent TB                             | 1.13 (0.75-1.71) | 0.573   | 1.31 (0.84-2.05) | 0.238   |
| Log <sub>10</sub> viral load (copies/ml) | 1.57 (1.26-1.97) | < 0.001 | 1.57 (1.26-1.96) | 0.004   |

aHR: adjusted hazard ratios
